# Supplementary material for: Is there a diffusion of alkali in the activation of dissolving cellulose pulp at low NAOH stoichiometric excess?
Source: Springer Nature journal article supplement (doi:10.1007/s10570-018-2104-9), 2018-11-10
Supplement: MOESM1 [file 16264168]

**IS THERE A DIFFUSION OF ALKALI IN THE ACTIVATION OF DISSOLVING CELLULOSE PULP AT LOW NaOH STOICHIOMETRIC EXCESS?**

Electronic supplementary material for journal Cellulose

Diana Carolina Reyes Forsberga, Kjell Stridhb, Paul P. de Witc, and Ola Sundmana

aDepartment of chemistry, Umeå University, SE-901 87 Umeå, Sweden.

bAkzoNobel, SE-444 85 Stenungssund, Sweden.

cAkzoNobel, PO Box 5544, 6802 EM, Arnhem, The Netherlands.

Corresponding author: Ola Sundman, [ola.sundman@umu.se](mailto:ola.sundman@umu.se), tel: +46907866072


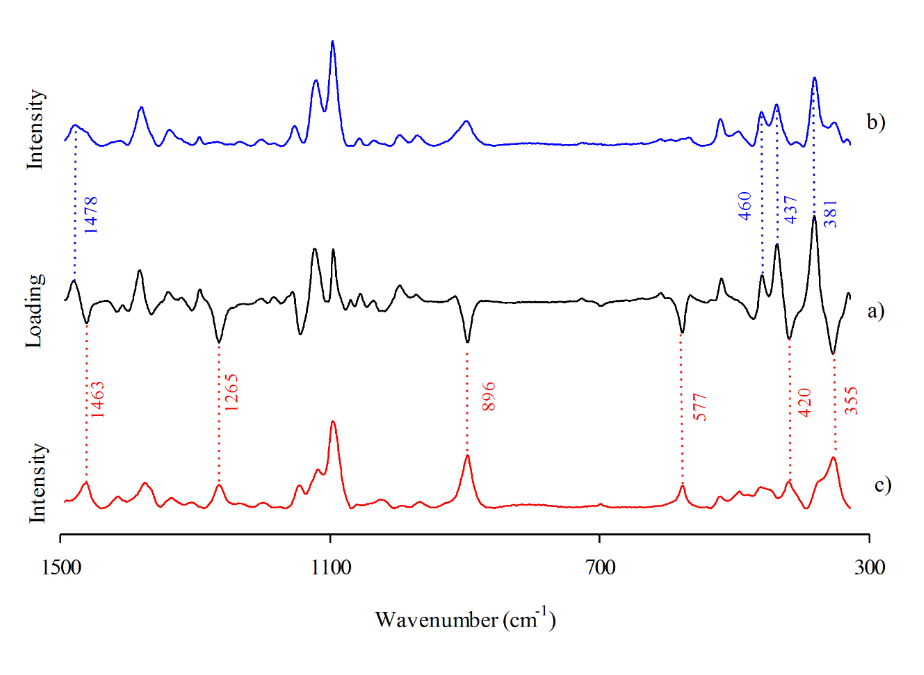


**Fig. S1** (a) Loadings line plot of the first component (R2 = 98%) in the PLS calibration model and its correlation to the Raman spectra of (b) Cell I and (c) Cell II

**Fig. S2** DoA of mapping areas vs reaction time for replicates where (r) = 0.8 after subsequent addition of dry cellulose. “Pre” refers to the pre-mercerised cellulose, while t5 represents 5 min after addition of non-mercerised cellulose, *i.e*. the starting point for the diffusion study. t10 and t25 refers to 10 min and 25min after addition of non-mercerised cellulose, respectively.

**Fig. S3** DoA of mapping areas vs reaction time for replicates where (r) = 1.3 after subsequent addition of dry cellulose. “Pre” refers to the pre-mercerised cellulose, while t5 represents 5 min after addition of non-mercerised cellulose, *i.e*. the starting point for the diffusion study. t10 and t25 refers to 10 min and 25min after addition of non-mercerised cellulose, respectively.

**Fig. S4** DoA versus reaction time for replicate 1 (orange bar) and replicate 2 (blue bar) mercerised at (r) = 0.8 and different [NaOH]. (a) 10%, and (b) 20%, (c) 30%, (d) 40% and (e) 50% [NaOH].


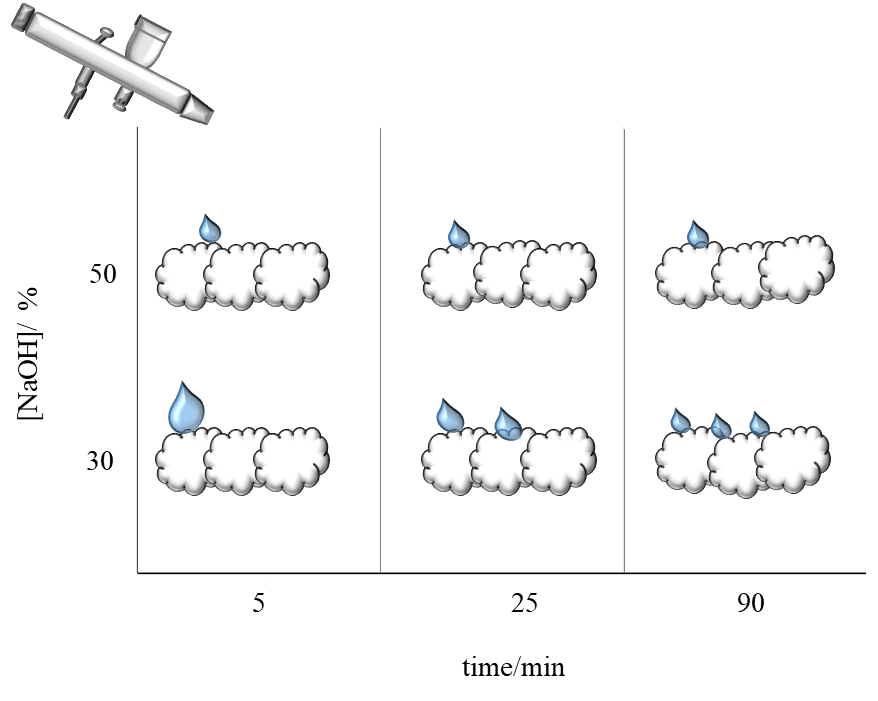


**Illustration. S1** Schematic representation of diffusion of NaOH at LWC mercerisation
